# Supplementary material for: Autophagy deficiency leads to accumulation of ubiquitinated proteins, ER stress, and cell death in Arabidopsis
Source: PubMed Central journal article supplement — Autophagy. 2014 Jul 7;10(9):1579–87. doi: 10.4161/auto.29406 (PMC4206536; doi:10.4161/auto.29406), 2014-07-07
Supplement: auto-10-1579-s01.pdf [file auto-10-1579-s01.pdf]

## **Supplemental Material to:**

**David Munch, Eleazar Rodriguez, Simon Bressendorff,  
Ohkmae K Park, Daniel Hofius, and Morten Petersen**

**Autophagy deficiency leads to accumulation  
of ubiquitinated proteins, ER stress, and cell death  
in *Arabidopsis***

**Autophagy 2014; 10(9)**

**<http://dx.doi.org/10.4161/auto.29406>**

**[www.landesbioscience.com/journals/autophagy/article/29406](http://www.landesbioscience.com/journals/autophagy/article/29406)**

Figure S1

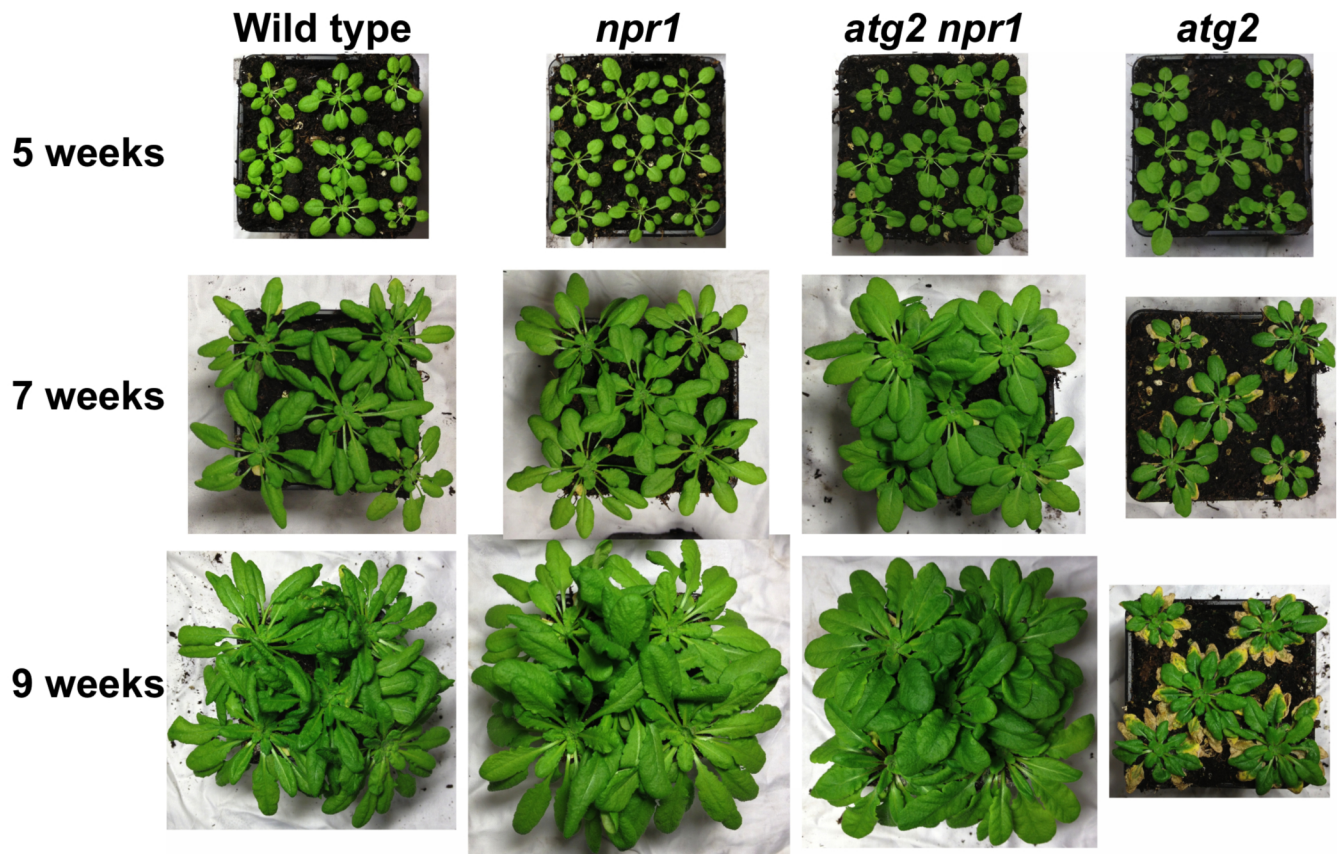

Figure S2

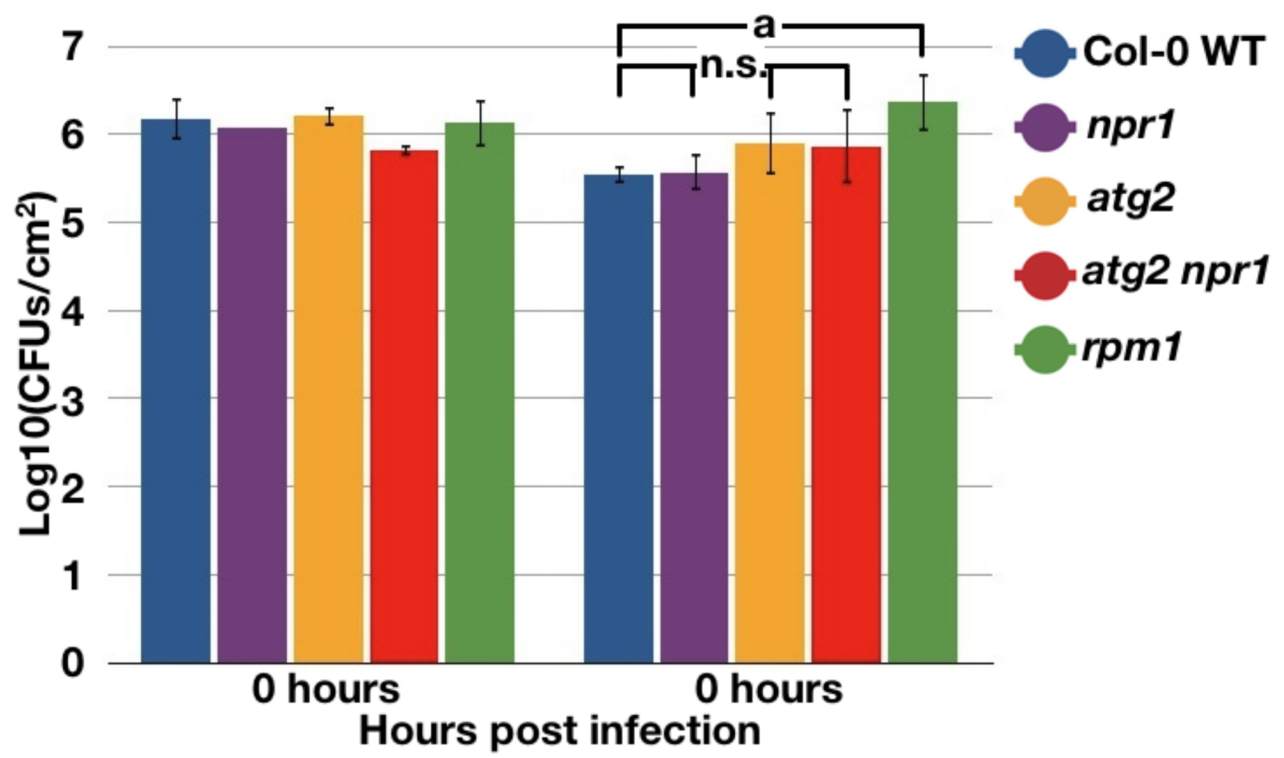

Figure S3

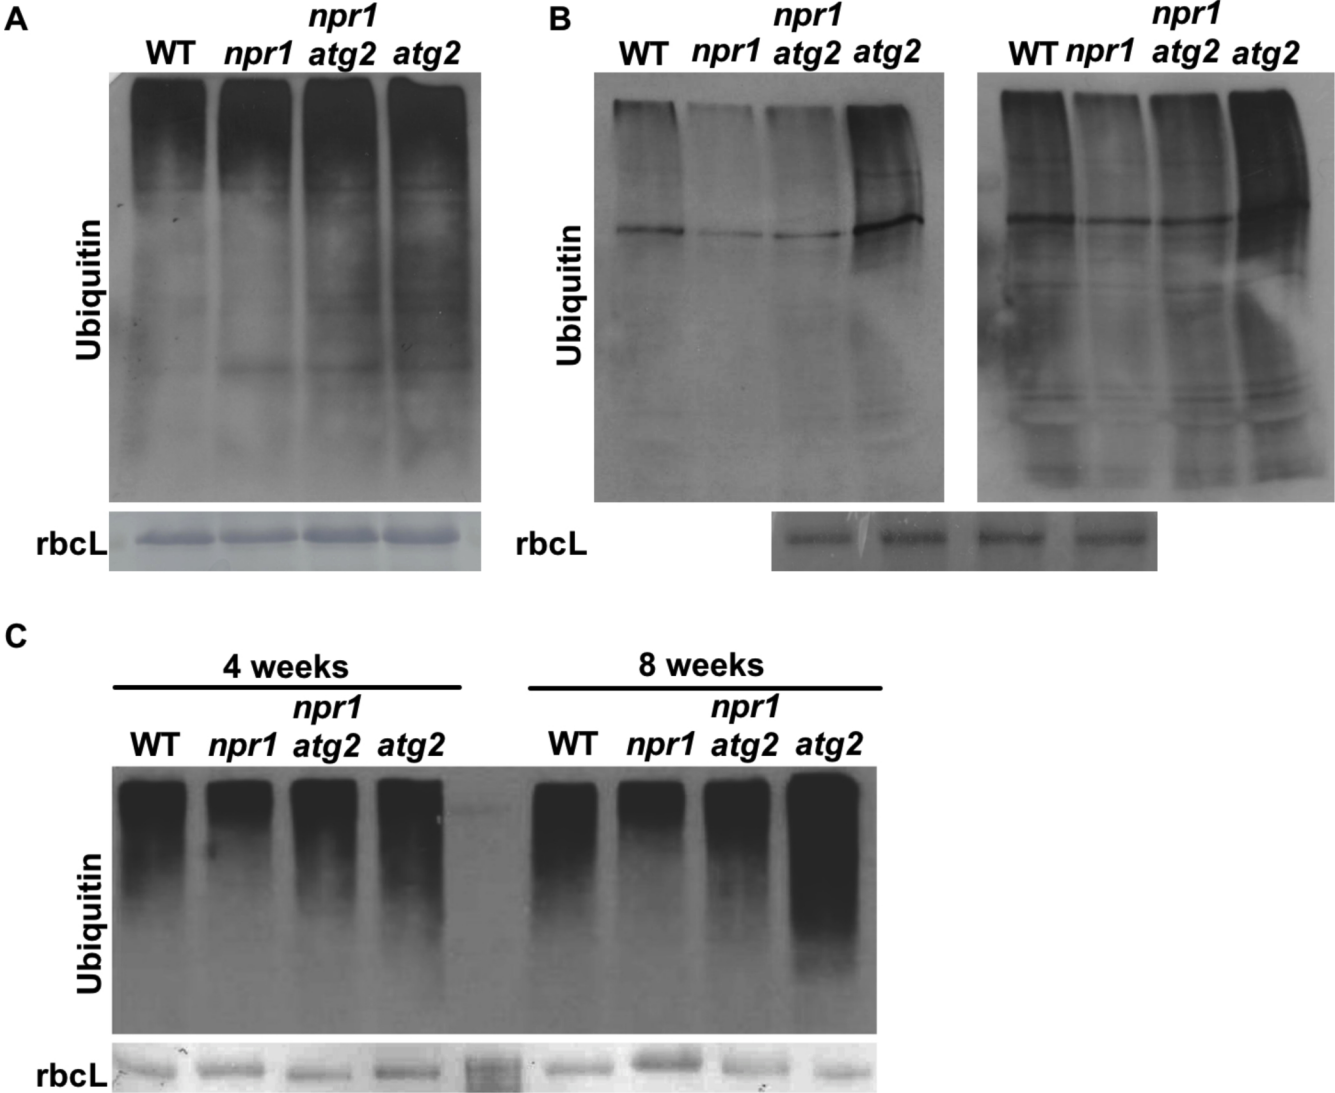

Figure S4

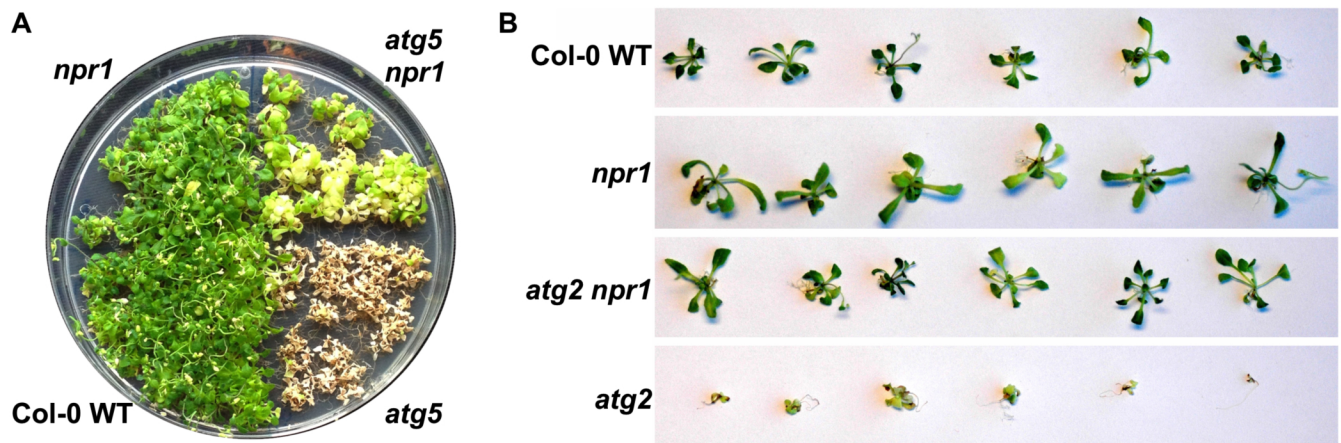

1 **Figure S1.** Phenotypes of 5-, 7- and 9-wk-old Col-0 WT, *npr1*, *atg2 npr1*, and *atg2* plants. Significant  
2 morphological differences were not detected among the genotypes at 3 wk. At 7 wk, early senescence is  
3 established in *atg2* mutants, which can be alleviated by a loss of NPR1 function.

4 **Figure S2.** Growth of avirulent *Pst* DC3000 (*AvrRpm1*) in 5-wk-old WT, *npr1*, *atg2*, *atg2 npr1*, and  
5 *rpm1* plants. Plants were inoculated with  $1 \times 10^8$  colony forming units (CFU) mL<sup>-1</sup> and log<sub>10</sub> bacterial  
6 counts per area of leaf plotted against 0 and 6 h post-infection. Recognition of RPM1 triggers HR to fight  
7 bacterial growth, but *rpm1* mutants do not recognize the effector and allow significant growth of the  
8 pathogen. Error bars indicate standard deviation calculated from the mean of 3 samples per genotype.  
9 Pairwise comparisons for all means at the 6-h time point post-infection were performed with a one-way  
10 ANOVA test followed by the Tukey post-hoc test. n.s., not significant. a,  $P \leq 0.05$ .

11 **Figure S3.** Age-dependent accumulation of ubiquitinated proteins in *atg* mutants is alleviated by  
12 mutations in *npr1* (A) Increased exposure of the HRP-developed immunoblot of ubiquitin from 3 wk-old  
13 tissue from WT, *npr1*, *atg2 npr1*, and *atg2* plants, shown in Figure 3A. Amido black staining of the large  
14 subunit of RuBisCO serves as loading control. Anti-ubiquitin antibody was from Dako. (B) Confirmation  
15 of the results presented in Fig. 3 by probing the blots using an alternative anti-ubiquitin antibody (from  
16 Agrisera). Two different exposures of the same HRP-developed immunoblot of ubiquitin from 6-wk-old  
17 WT, *npr1*, *atg2 npr1*, and *atg2* plants. (C) Immunoblot detection of ubiquitin (antibody from Dako) in 4-  
18 and 8-wk-old WT, *npr1*, *atg2 npr1*, and *atg2* plants respectively. Amido black staining of the large  
19 subunit of RuBisCO serves as loading control.

20 **Figure S4.** Combinatorial treatments with tunicamycin and BTH mimic senescence in young autophagy-  
21 deficient mutants (A) Early senescence in *atg5* mutants induced by combinatory TM/BTH stress is  
22 alleviated by loss of NPR1 function. Five-wk-old Col-0 WT, *npr1*, *atg5*, and *atg5 npr1* plants grown on  
23 MS plates supplemented with 5 ng/mL TM and 50  $\mu$ M BTH. (B) Single seedlings of Col-0 WT, *npr1*,

24 *atg2 npr1*, and *atg2* grown 12 d on MS plates, followed by the transfer of single seedlings to MS plates  
25 supplemented with 5 ng mL<sup>-1</sup> TM and 50 μM BTH, and subsequently grown for an additional 16 d before  
26 pictures were taken.
